# Supplementary material
Source: Elsevier journal article supplement (https://rcastoragev2.blob.core.windows.net/dd8e53769facfdeba33434aaf01a539d/mmc1.pdf)
Supplement: mmc1 [file mmc1.pdf]

**Supplemental information**

**Hypoxic and pharmacological activation**

**of HIF inhibits SARS-CoV-2**

**infection of lung epithelial cells**

**Peter A.C. Wing, Thomas P. Keeley, Xiaodong Zhuang, Jeffrey Y. Lee, Maria Prange-Barczynska, Senko Tsukuda, Sophie B. Morgan, Adam C. Harding, Isobel L.A. Argles, Samvid Kurlekar, Marko Noerenberg, Craig P. Thompson, Kuan-Ying A. Huang, Peter Balfe, Koichi Watashi, Alfredo Castello, Timothy S.C. Hinks, William James, Peter J. Ratcliffe, Ilan Davis, Emma J. Hodson, Tammie Bishop, and Jane A. McKeating**

## Supplemental Figures

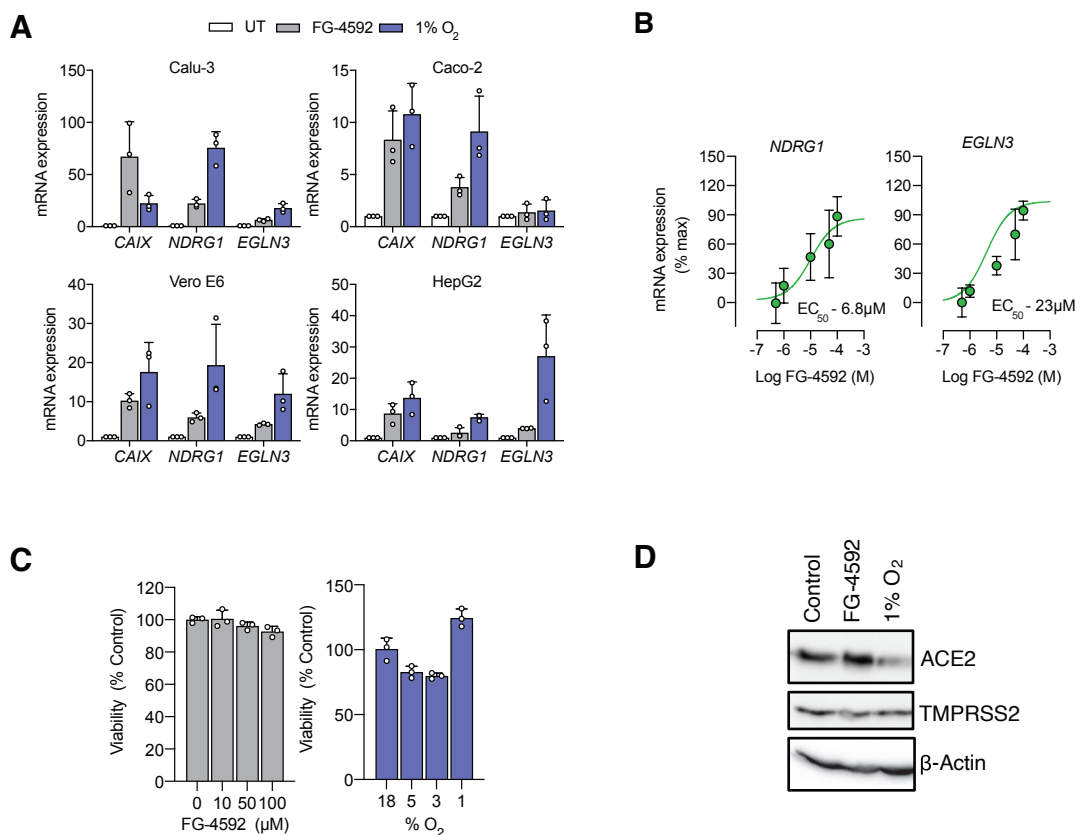

**Fig.S1 Hypoxic gene induction in ACE2 expressing cells. [Related to Fig.1]** (A) Calu-3, Caco-2, Vero E6 and HepG2 cells were treated with FG-4592 (50 $\mu$ M) or 1% O<sub>2</sub> for 24h with *CAIX*, *NDRG1*, and *EGLN3* mRNA assessed by qPCR. Data are expressed relative to normoxic untreated (UT) cells as mean  $\pm$  S.D. from n=3 biological replicates. (B) HepG2 cells were treated with increasing concentrations of FG-4592 for 24h with *NDRG1* and *EGLN3* mRNA quantified. Half-maximal effective concentration (EC<sub>50</sub>) values for both genes in response to FG-4592 treatment were calculated. (C) The impact of either FG-4592 or hypoxic incubation on the viability of Calu-3 cells was assessed through quantification of extracellular lactate dehydrogenase (LDH) 24h post-treatment. (D) HepG2 cells were treated with FG-4592 (50 $\mu$ M) or 1% O<sub>2</sub> for 24h and ACE2/TMPRSS2 protein expression assessed by immunoblot.  $\beta$ -Actin was used to show equal protein loading.

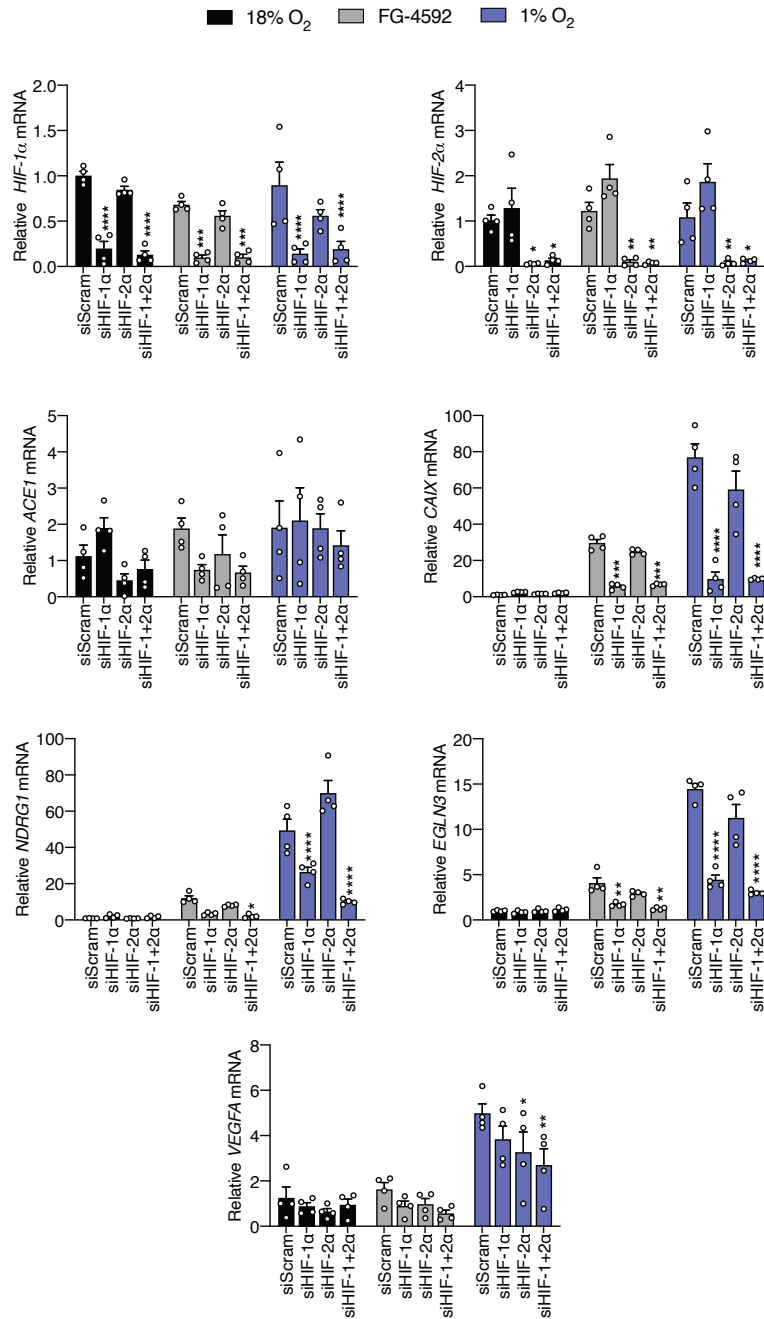

**Fig.S2: Validating siRNA silencing of HIF-1α and HIF-2α in Calu-3 cells. [Related to Fig.2].**

siRNAs targeting either HIF-1 or 2α were delivered into Calu-3 cells either individually or in combination along with a control scrambled siRNA. 48h post-transfection the cells were treated with FG-4592 (50μM) or 1% O<sub>2</sub> for 24h and total cellular RNA extracted. siRNA knock-down was confirmed by qPCR quantification of *HIF-1α*, *HIF-2α*, *ACE1*, *CAIX*, *NDRG1*, *EGLN3* and *VEGFA* mRNA levels. Bars represent mean ± S.D. from n=4 biological replicates and data plotted relative to siScram at 18% O<sub>2</sub> with statistical significance determined by two-way ANOVA, \* p<0.05 \*\* p<0.01, \*\*\* p<0.001, \*\*\*\* p<0.0001.

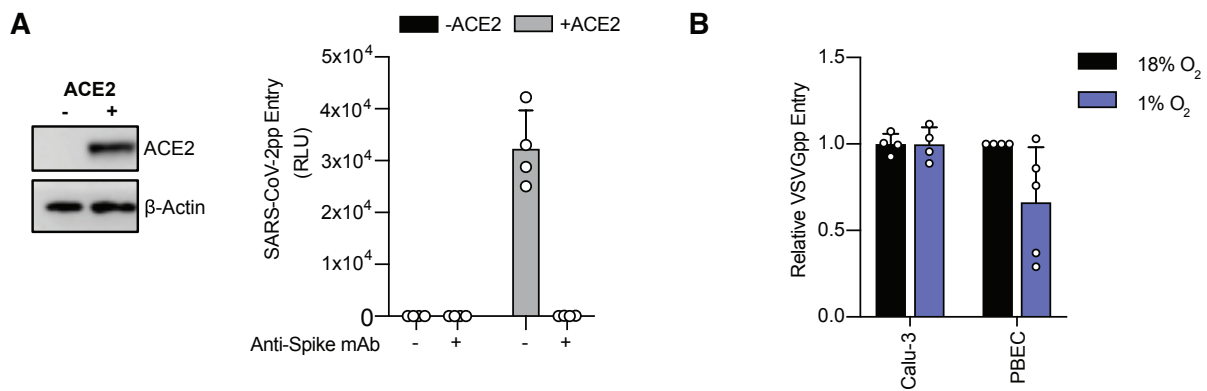

**Fig.S3: SARS-CoV-2pp entry is ACE2 dependent. [Related to Fig.2]. (A)** Human embryonic kidney 293T cells were transfected with a control or human ACE2 overexpression plasmid and infected with SARS-CoV-2 pseudoparticles (pp) 48h post-transfection. ACE2 expression was confirmed by immunoblot. SARS-CoV-2pp were pre-treated with or without an anti-Spike mAb FI-3A (1μg/ml) for 30min prior to infection. Data is mean ± S.D. from n=4 biological replicates. **(B)** Calu-3 or PBECs were cultured under 18% or 1% O<sub>2</sub> for 24h before infection with viral pseudoparticles expressing vesicular stomatitis virus glycoprotein (VSV-G). Infection was assessed 48h later by quantification of luciferase activity. Data is expressed relative to the normoxic samples and is the mean ± S.D. of n=4 biological replicates.

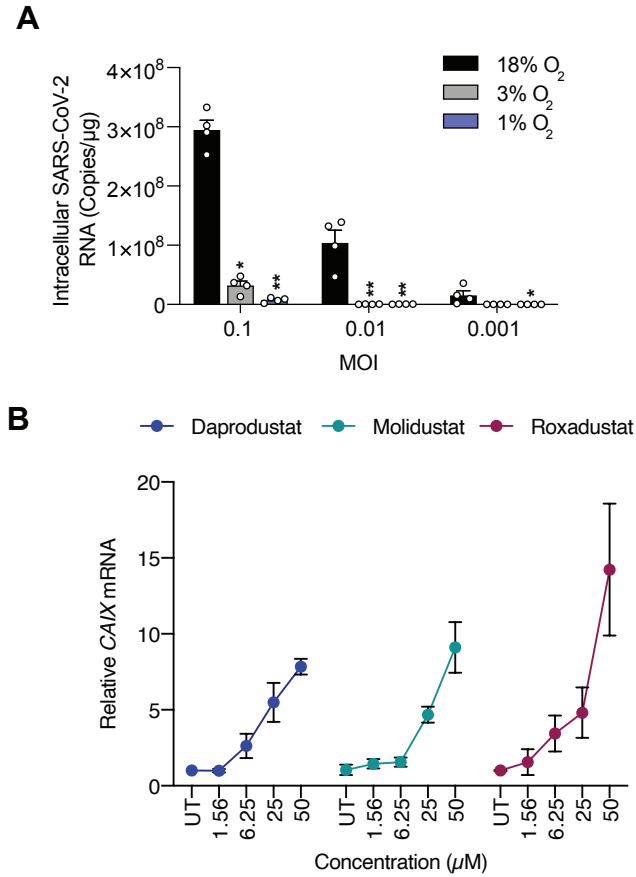

**Fig.S4: Dose dependent Inhibition of SARS-CoV-2 by hypoxia and HIF prolyl hydroxylase inhibitors. [Related to Fig.2].** (A) Calu-3 cells were incubated at 18%, 3% or 1% O<sub>2</sub> for 24h prior to infection with SARS-CoV-2 at the indicated MOIs. Viral RNA was quantified from infected cells 24h post infection. (B) Calu-3 cells were treated increasing concentrations of Daprodustat (GSK1278863), Molidustat (Bay 85-3934) or Roxadustat (FG-4592), infected with SARS-CoV-2 and CAIX mRNA quantified by qPCR. All data is n=4 biological replicates and presented as mean ± S.D. with statistical significance determined by two-way ANOVA, \* p<0.05 \*\* p<0.01.

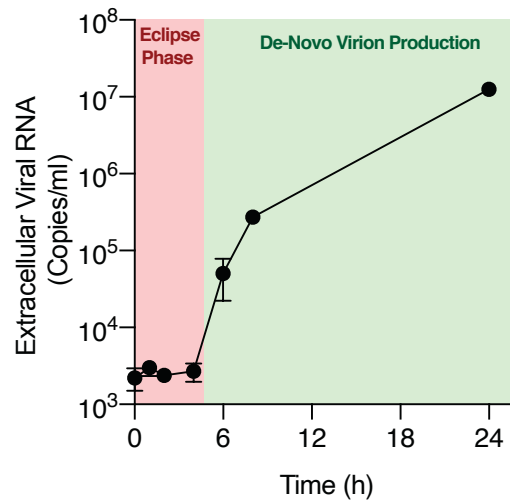

**Fig.S5. Single step growth curve of SARS-CoV-2. [Related to Fig.4].** Calu-3 cells were inoculated with SARS-CoV-2 for 1h at an MOI of 1, unbound virus removed by washing and cells cultured in 18% O<sub>2</sub>. At the indicated times extracellular samples were collected and SARS-CoV-2 RNA quantified by qPCR. Data is presented as mean  $\pm$  range of n=2 biological replicates.

**Supplementary Table 1: Probe sequences for quantification of SARS-CoV-2 RNA by smFISH [Related to STAR METHODS]**

|                             |
|-----------------------------|
| <b>Positive gRNA probes</b> |
| TAGATCGGCGCCGTAACAT         |
| TCCTTTATTACCGTTCTTAC        |
| AGAAGAACCCTTGCGGTAAGC       |
| TACTGAATGCCTTCGAGTTC        |
| AGCATCCGAACGTTTGATGA        |
| TAGTAGTTGTCTGATTGTCC        |
| GTCTTGTTGACCAACAGTTT        |
| CTCATATTGAGTTGATGGCT        |
| AGTAGTATGTAGCCATACTC        |
| TCTAAATCAATGCCAGTGG         |
| GTAATTCAGATACTGGTTGC        |
| CCTTTGAGTGTGAAGGTATT        |
| GAGCAACATAAGCCCGTTAA        |
| AGGTTGTTCTAATGGTTGTA        |
| CATAGGGCTGTTCAAGTTGA        |
| GCTTTTAGAGGCATGAGTAG        |
| TGCGTGACAAATGTTTCACC        |
| AAGGCTTTAAGTTTAGCTCC        |
| CCCAACCGTCTCTAAGAAAC        |
| AAGCCAATCAAGGACGGGT         |
| TTAGTTAGCCACTGCGAAGT        |
| ACTGAACAACACCACCTGTA        |
| GTAGGCCATTACAACATAGAT       |
| AGTAGCCAAATCAGATGTGA        |
| TTATAGCGGCCTTCTGTAAA        |
| TTGACGTGCCTCTGATAAGA        |
| TGCGGGAGAAAATTGATCGT        |
| GGCGATCTCTTCATTAAGTT        |
| GGTTGTCATTAAGACCTTCG        |
| ACAACCTATGTTAGCGCTAG        |
| ATAGGCACACTTGTTATGGC        |
| TCCAAAGGCAATAGTGCGAC        |
| AAGACTATGCTCAGGTCCTA        |
| AGTAACCACAAGTAGTGGCA        |
| TCACACTTCATGAGAGTTGA        |
| GCACATTTGGTTGCATTCAT        |
| CAAAGCCACGTACGAGCAGC        |
| GGTGACGCAACTGGATAGAC        |
| CCTTGTTGAATAGTCTTGA         |
| TTTCAGAACGTTCCGTGTAC        |
| CCAGTTGTTTCGGACAAAGTG       |
| TTACCAGCACGTGCTAGAAG        |
| AATGCACTCAAGAGGGTAGC        |
| GTTATCGACATAGCGAGTGT        |
| TAAGCTCACGCATGAGTTCA        |
| CTTCATAAGGATCAGTGCCA        |
| CTCGTCGCCTAAGTCAAATG        |
| GCGAACCTGTAAAACAGGCA        |
